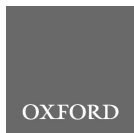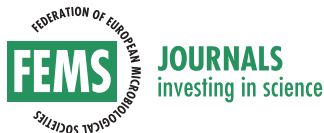

RESEARCH ARTICLE

# Conserved genomic and amino acid traits of cold adaptation in subzero-growing Arctic permafrost bacteria

Isabelle Raymond-Bouchard<sup>1</sup>, Jacqueline Goordial<sup>1,2,†</sup>, Yevgen Zolotarov<sup>1</sup>, Jennifer Ronholm<sup>1</sup>, Martina Stromvik<sup>1</sup>, Corien Bakermans<sup>3</sup> and Lyle G. Whyte<sup>1,\*</sup>

<sup>1</sup>McGill University, Macdonald Campus, 21,111 Lakeshore Rd, Ste.-Anne-de-Bellevue, QC, H9X 3V9, Canada,

<sup>2</sup>Bigelow laboratory for Ocean Sciences, 60 Bigelow Dr, East Boothbay, ME, 04544, USA and <sup>3</sup>Altoona College, Pennsylvania State University, 3000 IvySide Park, Altoona, PA, 16601, USA

\*Corresponding author: Department of Natural Resource Sciences, McGill University, 21111 Lakeshore Rd. Ste-Anne-de-Bellevue, Montreal, Quebec H9X 3V9 Canada. Tel: +1-514-398-7823; Fax: +1-514-398-7990; E-mail: [lyle.whyte@mcgill.ca](mailto:lyle.whyte@mcgill.ca)

**One sentence summary:** This is the first large scale study focused on identifying genomic and molecular traits associated with cold adaptation in subzero-growing bacteria from permafrost.

Editor: Max Haggblom

<sup>†</sup>Jacqueline Goordial, <http://orcid.org/0000-0001-5005-673X>

## ABSTRACT

Permafrost accounts for 27% of all soil ecosystems and harbors diverse microbial communities. Our understanding of microorganisms in permafrost, their activities and adaptations, remains limited. Using five subzero-growing (cryophilic) permafrost bacteria, we examined features of cold adaptation through comparative genomic analyses with mesophilic relatives. The cryophiles possess genes associated with cold adaptation, including cold shock proteins, RNA helicases, and oxidative stress and carotenoid synthesis enzymes. Higher abundances of genes associated with compatible solutes were observed, important for osmoregulation in permafrost brine veins. Most cryophiles in our study have higher transposase copy numbers than mesophiles. We investigated amino acid (AA) modifications in the cryophiles favoring increased protein flexibility at cold temperatures. Although overall there were few differences with the mesophiles, we found evidence of cold adaptation, with significant differences in proline, serine, glycine and aromaticity, in several cryophiles. The use of cold/hot AA ratios of >1, used in previous studies to indicate cold adaptation, was found to be inadequate on its own. Comparing the average of all cryophiles to all mesophiles, we found that overall cryophiles had a higher ratio of cold adapted proteins for serine (more serine), and to a lesser extent, proline and acidic residues (fewer prolines/acidic residues).

**Keywords:** psychrophile; psychrotroph; cold adaptation; subzero; permafrost; amino acid composition

## INTRODUCTION

Permafrost accounts for 27% of all soil ecosystems on earth and is home to active and diverse microbial communities, despite extreme conditions characterized by permanent sub-zero temperatures, low water activity and often oligotrophic conditions

(Goordial et al. 2012). The identification of active microbial communities in permafrost has fueled interest in understanding the adaptations that allow these organisms to sustain their growth and survival in such harsh environments. Reduced enzyme

Received: 8 August 2017; Accepted: 7 March 2018

© FEMS 2018. All rights reserved. For permissions, please e-mail: [journals.permissions@oup.com](mailto:journals.permissions@oup.com)

activity, protein denaturation and misfolding, inhibitory secondary RNA/DNA structures and increases in membrane rigidity are challenges that must be overcome at low temperatures (Bakermans et al. 2012; Mykytczuk et al. 2013; De Maayer et al. 2014). Noted adaptations to cold found in psychrophiles include, but are not limited to, using cold shock proteins and helicases to stabilize DNA/RNA processes, membrane modifications to increase unsaturated and branched chain fatty acids, synthesis of carotenoids and antifreeze proteins, stimulation of osmotic and oxidative responses, differential expression of isozymes with different temperature optima and broad changes in translational and ribosomal processes (Bakermans et al. 2012). In this paper, we use the term psychrophile to encompass both eurypsychrophiles and stenopsychrophiles (Feller and Gerday 2003; Cavicchioli 2016); eurypsychrophiles are defined as organisms that possess a broad growth range ( $T_{max} > 20^{\circ}\text{C}$ ), and who, while capable of growth at very low temperatures ( $-15^{\circ}\text{C}$ ), usually retain optimum growth rates at temperatures above  $20^{\circ}\text{C}$ , while stenopsychrophiles exhibit narrower growth ranges ( $T_{max} < 20^{\circ}\text{C}$ ), and usually grow best at temperatures ranging between  $5^{\circ}\text{C}$  and  $15^{\circ}\text{C}$  (Cavicchioli 2006). The term cryophile is used here to denote specifically those psychrophiles that can grow at subzero temperatures (Seckbach 2013; Vester, Glaring and Stougaard 2015; Goordial et al. 2016).

Ensuring that adequate flexibility is retained is a crucial adaptation of cold active proteins to preserve function at low temperatures. Cold adapted proteins have been shown to possess a number of amino acid (AA) changes that impart increased flexibility, including fewer salt bridges, a lower content of proline residues, fewer hydrogen bonds, a reduced Arg/(Arg + Lys) ratio and increased serine and glycine content (Aghajari et al. 1998; Russell et al. 1998; Georlette et al. 2000; Huston, Methe and Deming 2004; Collins, Gerday and Feller 2005; Ræder et al. 2008; Metpally and Reddy 2009). For example, the elongation factor 2 protein of the eurypsychrophilic archaea *Methanococcoides burtonii*, isolated from the permanently cold Ace Lake in Antarctica, exhibits greater structural flexibility as a result of fewer salt bridges, less densely packed hydrophobic cores and a reduction in proline residues in surface loops (Thomas and Cavicchioli 2000). A lipase from the Antarctic bacterium *Psychrobacter immobilis* B10 also contains a low number of salt bridges and proline residues, along with a reduced proportion of arginine to lysine residues, a small hydrophobic core and a very small number of aromatic-aromatic interactions (Arpigny, Lamotte and Gerday 1997). Differences in  $k_{cat}$  and  $K_m$  values, corresponding to increased catalytic efficiency at lower temperatures, have been measured in certain psychrophilic enzymes when compared to their meso- or thermophilic homologs (Feller et al. 1992; Georlette et al. 2000; Thomas, Kumar and Cavicchioli 2001).

Several studies have carried out comparative genomic analyses between psychrophiles and mesophiles and/or thermophiles in order to examine differences in AA composition, which may impart greater flexibility of proteins in cold adapted microorganisms. Of these, only four focused on microorganisms that exhibit growth at subzero temperatures and in each case focused on a single organism (Méthé et al. 2005; Ayala-del-Río et al. 2010; Mykytczuk et al. 2013; Goordial et al. 2016). Previous genomic analyses include those focused on psychrophilic protein comparisons against large nonredundant protein databases and comparisons against select specific mesophiles (Saunders et al. 2003; Rabus et al. 2004; Méthé et al. 2005; Grzymiski et al. 2006; Metpally and Reddy 2009; Ayala-del-Río et al. 2010; Zhao et al. 2010; Mykytczuk et al. 2013; Goordial et al. 2016). Methods for comparison have included those that compare total AA counts

or composition across an entire genome between mesophiles and psychrophiles, to those that compare AA counts only between previously matched homologous proteins. Results from these studies have been inconsistent. While some identified a number of changes in AA composition or proportions in psychrophilic genomes, consistent with those identified in psychrophilic proteins (Saunders et al. 2003; Ayala-del-Río et al. 2010; Zhao et al. 2010), others have found limited changes (Méthé et al. 2005; Mykytczuk et al. 2013; Goordial et al. 2016), and in some cases, none (Rabus et al. 2004; Yang et al. 2015). It remains unclear whether these AA substitutions are universal adaptations that can be conclusively identified on a large scale across genomes in psychrophiles. It is also of interest to determine if there are different adaptations associated with psychrophiles capable of growth at sub-zero temperatures (cryophiles), compared with those psychrophiles that have narrower growth ranges and that may not be adapted to the challenges associated with subfreezing temperatures. To our knowledge, very few studies on AA cold adaptive traits in psychrophiles have looked specifically at cryophilic psychrophiles. Furthermore, in those studies that perform comparisons using distantly related organisms, it is not always apparent if the differences observed are the result of cold adaptation or simply phylogenetic divergence. Comparisons using organisms in the same genus, or neighbor genus, provide a more stringent analysis, as we expect these members to share close common ancestry, and therefore observed AA differences between psychrophiles and their close mesophilic relatives are more likely to be the result of cold adaptation.

In the present study, we selected five subzero-growing (cryophilic) strains (Table 1), previously isolated from the Canadian high Arctic (Steven et al. 2007a, 2008; Lacelle et al. 2011) and spanning several phyla (ia, Proteobacteria and Firmicutes), for genome sequencing and annotation, which were used to perform in-depth genomic and AA comparative analyses. These organisms were isolated from permafrost environments that are harsh, often oligotrophic, with low water activity ( $aw = \sim 0.85$ ) and ambient *in situ* temperatures of  $\sim -17^{\circ}\text{C}$  (Gilichinsky, Soina and Petrova 1993; Steven et al. 2007b, 2008). Survival of microbes in these environments is hypothesized to be possible due to the presence of very thin brine films (Gilichinsky et al. 2003; Steven et al. 2006), where higher solute and salt concentrations act as freezing point depressants, allowing water to remain liquid. It is expected that microorganisms adapted to these environments would have mechanisms that allow them to grow under both cold (subzero) and high salt conditions. Canadian Arctic permafrost salt concentrations have been estimated at  $\sim 14.6$  g/kg (Steven et al. 2007a), while salt concentrations in Siberian cryopeg brine lenses have been measured at 170–300 g/L (17–30%) (Gilichinsky et al. 2003). We compared the genomes of our cryophilic strains from these environments to closely related mesophilic relatives in the same genus. With these new genome sequences, we aim to increase our potential for understanding and identifying the AA basis of cold adaptation in sub-zero growing organisms, including potentially conserved or important adaptive traits. In addition, we also investigate the presence of known cold adaptation genes as well as genomic redundancy, which is the presence of multiple gene copies, in each cryophile.

## MATERIALS AND METHODS

### Organism selection and identity

*Actinotalea* sp. KRM CY2, *Paenisporosarcina* sp. Eur1 9.01.10, *Methylobacterium* sp. AL-11, *Kocuria* sp. KROCY2 and *Polaromonas* sp.

**Table 1.** Permafrost and ice wedge strains selected for sequencing and cold adaptation analysis.

| Strain                                                 | Location isolated | Sample type | Temp °C | Salinity (%) | Phylum         | Reference                          |
|--------------------------------------------------------|-------------------|-------------|---------|--------------|----------------|------------------------------------|
| <i>Actinotalea</i> sp. KRM CY2 <sup>a</sup>            | Moose Lake, Yukon | Ice Wedge   | -5-25   | 0-8          | Actinobacteria | This study & Lacelle et al. (2011) |
| <i>Polaromonas</i> sp. Eur3 1.2.1                      | Eureka, Nunavut   | Permafrost  | -5-22   | 0-3          | Proteobacteria | This study & Steven et al. (2008)  |
| <i>Paenisporosarcina</i> sp. Eur1 9.01.10 <sup>a</sup> | Eureka, Nunavut   | Permafrost  | -5-25   | 0-8          | Firmicute      | This study & Steven et al. (2007a) |
| <i>Methylobacterium</i> sp. AL-11                      | Eureka, Nunavut   | Permafrost  | -5-25   | 0-5          | Proteobacteria | This study & Steven et al. (2008)  |
| <i>Kocuria</i> sp. KROCY2 <sup>a</sup>                 | Old Crow, Yukon   | Ice Wedge   | -5-25   | 0-19         | Actinobacteria | This study & Lacelle et al. (2011) |

<sup>a</sup>*Actinotalea* sp. KRM CY2, *Paenisporosarcina* sp. Eur1 9.01.10 and *Kocuria* sp. KROCY2 were originally identified as *Cellulomonas* sp. KRM CY2, *Sporosarcina* sp. Eur1 9.01.10 and *Microbacterium* sp. KROCY2, respectively, but were renamed following genome sequencing and 16S rRNA gene analysis (see text).

Eur3 1.2.1. were isolated from permafrost cores from Eureka, Nunavut or from ice samples from the Yukon, as previously described (Steven et al. 2007a, 2008; Lacelle et al. 2011). These strains were selected for genomic sequencing due to their ability to grow at sub-zero temperatures under laboratory conditions (Table 1). Based on 16S rRNA gene sequencing *Kocuria* sp. KROCY2, *Paenisporosarcina* sp. Eur1 9.01.10 and *Actinotalea* sp. KRM CY2 were initially identified as belonging to the genus *Microbacterium*, *Sporosarcina* and *Cellulomonas*, respectively (Steven et al. 2007a; Lacelle et al. 2011). However, recent 16S rRNA gene analyses using the EzBioCloud quality-controlled database (Yoon et al. 2017) has identified the closest taxonomically valid type strains for *Kocuria* sp. KROCY2, *Paenisporosarcina* sp. Eur1 9.01.10 and *Actinotalea* sp. KRM CY2 to be *Kocuria palustris* DSM 11 925(T) (100% similarity), *Paenisporosarcina indica* PN2T(T) (99.16% similarity) and *Actinotalea ferrariae* CF5-4(T) (98.13% similarity), respectively (Table S1, Supporting Information). Thus, we have renamed our strains accordingly. The closest taxonomically classified type strains for *Polaromonas* sp. Eur3 1.2.1 and *Methylobacterium* sp. EUR3 AL-11 were *Polaromonas jejuensis* NBRC 106 434(T) (99.04% similarity) and *Methylobacterium radiotolerans* JCM 2831(T) (99.93% similarity), respectively.

### Growth conditions

Cultures were maintained on R2A agar or liquid (BD Difco, Sparks, Maryland) for *Actinotalea* sp. KRM CY2, *Paenisporosarcina* sp. Eur1 9.01.10, *Methylobacterium* sp. AL-11 and *Kocuria* sp. KROCY2 and  $\frac{1}{2}$  R2A for *Polaromonas* sp. Eur3 1.2.1. Growth temperatures were described previously (Steven et al. 2007a, 2008; Lacelle et al. 2011) on agar only and tested in this study using liquid cultures at -5°C, 0°C, 5°C, 10°C, 22°C and 25°C in Tryptic Soy Broth (TSB; BD Difco, Sparks, Maryland), 1/10 TSB,  $\frac{1}{4}$  TSB, R2A or  $\frac{1}{2}$  R2A and supplemented with varying concentrations (2%–7%) of sucrose, glycerol or NaCl at subzero temperatures. Salinity tolerance was determined from liquid cultures grown on R2A amended with NaCl in 1%–2% increments from 0% to 20%. Previous phylogenetic classification was verified by comparing the 16S rRNA gene sequence of each organism to the EzBioCloud quality-controlled database for comparison to valid taxonomically classified type strains (Yoon et al. 2017).

### DNA extraction

Strains were grown to stationary state at room temperature (~23°C) on TSB (BD Difco). Genomic DNA was isolated using the

Epicentre MasterPure Gram Positive DNA Purification Kit (Epicentre, Madison, Wisconsin) as per the manufacturer's instructions. Extracted DNA was checked for purity and quantified with the NanoDrop 1000 (ThermoScientific, Wilmington, Delaware) and sent for whole genome sequencing according to DOE Joint Genome Institute (JGI) standards.

### Genome sequencing and assembly

The draft genomes of *Kocuria* sp. KROCY2, *Actinotalea* sp. KRM CY2, *Polaromonas* sp. EUR3 1.2.1 and *Methylobacterium* sp. EUR3 AL-11 were generated at the DOE JGI using the Pacific Biosciences (PacBio) technology. PacBio SMRTbell libraries were constructed for each isolate and sequenced on the PacBio RS platform, which generated 166 364 filtered subreads totaling 486.7 Mbp for *Kocuria* sp. KROCY2, 253 745 filtered subreads totaling 785.8 Mbp for *Actinotalea* sp. KRM CY2, 150 954 filtered subreads totaling 668.5 Mbp for *Polaromonas* sp. EUR3 1.2.1, and 369 217 filtered subreads totaling 928.2 Mbp for *Methylobacterium* sp. EUR3 AL-11. All general aspects of library construction and sequencing performed at the JGI can be found at <http://www.jgi.doe.gov>. The raw reads were assembled using HGAP (version: 2.3.0) (Chin et al. 2013). The final draft assembly contained one contig in one scaffold for *Kocuria* sp. KROCY2, *Actinotalea* sp. KRM CY2 and *Polaromonas* sp. EUR3 1.2.1 and produced an average input read coverage of 186.4X, 179.6X and 108.4X, respectively, and seven contigs in seven scaffolds for *Methylobacterium* sp. EUR3 AL-11 with input read coverage of 158.9X.

The draft genome of *Paenisporosarcina* sp. EUR3 2.2.2 was generated at the DOE JGI using the Illumina technology. The Illumina shotgun library and long insert mate pair library were constructed and sequenced using the Illumina HiSeq 2000 platform (Bennett 2004). 22 752 872 reads totalling 3412.9 Mb were generated from the shotgun and 40 430 662 reads totalling 3679.2 Mb were generated from the long insert mate pair library. All general aspects of library construction and sequencing performed at the JGI can be found at <http://www.jgi.doe.gov>. All raw Illumina sequence data were passed through DUK, a filtering program developed at JGI, which removes known Illumina sequencing and library preparation artifacts (Li, Copeland and Han 2011). Filtered Illumina reads were assembled using AllpathsLG (Prepare-AllpathsInputs: PHRED 64 = 1 PLOIDY = 1 FRAG COVERAGE = 150 JUMP COVERAGE = 25; RunAllpathsLG: RUN = std pairs TARGETS = standard VAPI WARN ONLY = True OVERWRITE = True) (Gnerre et al. 2011). The final draft assembly contained 18 contigs in 5 scaffolds. The final assembly is based on 3412.4 Mb of Illumina Std PE, 3679.1 Mb of Illumina CLIP PE post filtered

data, which provides an average 2026.1X Illumina coverage of the genome.

### Genome annotation

Genes were identified using Prodigal (Hyatt et al. 2010), followed by a round of manual curation using GenePRIMP (Pati et al. 2010) for finished genomes and draft genomes in fewer than 10 scaffolds. The predicted CDSs were translated and used to search the National Center for Biotechnology Information (NCBI) nonredundant database, UniProt, TIGRFam, Pfam, KEGG, COG and InterPro databases. The tRNAScanSE tool (Lowe and Eddy 1996) was used to find tRNA genes, whereas ribosomal RNA genes were found by searches against models of the ribosomal RNA genes built from SILVA (Pruesse et al. 2007). Other non-coding RNAs such as the RNA components of the protein secretion complex and the RNase P were identified by searching the genome for the corresponding Rfam profiles using INFERNAL (Nawrocki and Eddy 2013). Additional gene prediction analysis and manual functional annotation was performed within the Integrated Microbial Genomes platform (<http://img.jgi.doe.gov>) developed by the Joint Genome Institute, Walnut Creek, CA, USA (Markowitz et al. 2009).

### Genome and AA analyses

The genomes of close relatives (genus or neighboring genus) to the cryophilic strains, which have been annotated as mesophiles, were collected from publicly available databases (JGI), and were used for comparative analyses to the cryophilic genomes (Table S2, Supporting Information). Functional gene assignments, including COG and KEGG categories and pathways, were obtained from the JGI website for all the genomes, cross-referenced and used for comparative analyses. AA cold adaptation analyses was carried out as described previously (Goordial et al. 2016), with some modifications. Briefly, custom databases were created using the mesophilic genomes, and each cryophilic genome was compared to the mesophilic databases using stand-alone BLASTP (Camacho et al. 2009) with a cut-off e-value of  $1e-15$ . The top BLASTP match protein sequence from each mesophile genome for each cryophilic protein was used for further analyses. Only non-hypothetical proteins and their mesophilic matches (full proteins) were included and assessed for cold adaptation at the AA level for the following indices previously associated with cold adaptation: arginine-to-lysine ratio; frequency of acidic, polar uncharged, and charged residues; proline, glycine, serine residues; aromaticity; aliphaticity; and grand average of hydropathicity (GRAVY). The values for each AA trait were averaged from the selected mesophilic proteins, and this average was compared to the cryophilic protein using a one-sample t-test. Cryophilic proteins that were found to be significantly different from the average of the mesophilic proteins ( $P < 0.05$ ) for each index were then assigned as 'cold adapted' or 'hot adapted' depending on the direction of change. We considered proteins cold adapted for each index if the direction of change was significantly lower for proline, R/K (arginine/lysine) ratio, acidic, charged, aliphatic, aromatic and hydrophobicity (GRAVY) indices and significantly higher for serine, glycine and polar uncharged indices (Table S3, Supporting Information). This analysis was repeated using the mesophile genomes, in the place of the cryophile genome, as controls and for comparison purposes. The proportions, in the total genome, of cold and hot adapted genes for the cryophiles and their mesophile controls

were compared using a chi-square test with Bonferroni correction ( $P \leq 0.0167$ ) to determine if the differences seen were significant. All AA analyses were carried out using in-house python scripts publicly available at <https://github.com/ColdAdaptationScripts>.

## RESULTS AND DISCUSSION

### Genome and strain properties

High-quality permanent drafts were obtained for all five cryophilic genomes (Table 2). *Kocuria* sp. KROC2 had the smallest genome at 2.8 Mbp, while the largest genome (7.2 Mbp) belonged to *Methylobacterium* sp. EUR3 AL-11 (Table 2). *Polaromonas* sp. Eur3 1.2.1 and *Actinotalea* sp. KRM2 had genomes of similar size at 4.4 Mbp and 4.5 Mbp, respectively, while *Paenisporosarcina* sp. Eur1 9.01.10 has a slightly smaller genome (3.5 Mbp). Consistent with the genome sizes *Methylobacterium* sp. EUR3 AL-11 had the highest number of predicted genes with 7001, followed by *Polaromonas* sp. Eur3 1.2.1, *Actinotalea* sp. KRM2 and *Paenisporosarcina* sp. Eur1 9.01.10 with 4238, 4145 and 3438 genes, respectively, and lastly *Kocuria* sp. KROC2 with 2480. Close to 80% of all protein coding genes could be assigned function predictions for all five organisms except for *Methylobacterium* sp. EUR3 AL-11, which was closer to 70% (Table 2). The GC content also varied greatly from 38% in *Paenisporosarcina* sp. Eur1 9.01.10 to 72% for *Actinotalea* sp. KRM2. *Methylobacterium* sp. EUR3 AL-11 and *Kocuria* sp. KROC2 both had 71% GC content, very similar to *Actinotalea* sp. KRM2. *Polaromonas* sp. Eur3 1.2.1 GC content was slightly lower at 60%. While GC rich regions have been noted in some psychrophiles (De Maayer et al. 2014), overall, we found GC content in our cryophiles to be consistent with other members of their respective genera (Table S2, Supporting Information). Interestingly, *Polaromonas* sp. Eur3 1.2.1 had a fairly high % (~10%) of horizontally transferred genes compared to the other cryophiles (1%–4%) (Table 2). However, we found similar levels to that of *Polaromonas* sp. Eur3 1.2.1 in other members of this genus (Table S2, Supporting Information).

We attempted to determine subzero growth rates for all the cryophilic strains; however, although chosen because of their ability to grow on solid R2A agar supplement with 7% sucrose at  $-5^{\circ}\text{C}$  (Steven et al. 2007a, 2008; Lacelle et al. 2011), we struggled to find liquid media adequate for growth at low temperatures in several strains. R2A media supplemented with 7% sucrose is susceptible to freezing in liquid form, and alternative liquid media tests have yet to be as successful for growth. In addition, we found both *Methylobacterium* sp. EUR3 AL-11 and *Actinotalea* sp. KRM2 susceptible to forming large clumps of cells in liquid cultures, further complicating growth curve measurements. Figure S1 (Supporting Information) shows growth on agar plates at subzero temperatures for those organisms for which obtaining subzero growth curves proved problematic. *Paenisporosarcina* sp. Eur1 9.01.10 grew well at  $-5^{\circ}\text{C}$  with a generation time of 14.6 days, although it grew optimally at  $25^{\circ}\text{C}$  (Table S4, Supporting Information). This growth rate is similar to that observed for other cryophiles at  $-5^{\circ}\text{C}$  (Mykytchuk et al. 2013; Goordial et al. 2016). Only *Polaromonas* sp. Eur3 1.2.1. exhibited characteristics of a stenopsychrophile with a faster generation time at  $10^{\circ}\text{C}$  (3.1 days) than at  $22^{\circ}\text{C}$  (3.4 days). It also showed similar generation times at  $0^{\circ}\text{C}$  (3.6 days) and was incapable of growth above  $22^{\circ}\text{C}$  (Table S4, Supporting Information). Several members of the genus *Sporosarcina* and *Polaromonas* are known to be psychrophilic, having been isolated from numerous polar

Table 2. Genome properties of sequenced permafrost strains.

| Organism                                            | <i>Polaromonas</i> sp. Eur3<br>1.2.1 | <i>Actinotalea</i> sp. KRM CY2     | <i>Kocuria</i> sp. KROCY2           | <i>Methylobacterium</i> sp.<br>EUR3 AL-11 | <i>Paenisporosarcina</i> sp.<br>Eur1 9.01.10 |
|-----------------------------------------------------|--------------------------------------|------------------------------------|-------------------------------------|-------------------------------------------|----------------------------------------------|
| Name in JGI database                                | <i>Polaromonas</i> sp. Eur3<br>1.2.1 | <i>Cellulomonas</i> sp.<br>KRM CY2 | <i>Microbacterium</i> sp.<br>KROCY2 | <i>Methylobacterium</i> sp.<br>EUR3 AL-11 | <i>Sporosarcina</i> sp. Eur3<br>2.2.2        |
| Genome size (Mbp)                                   | 4.4                                  | 4.5                                | 2.8                                 | 7.2                                       | 3.5                                          |
| %GC                                                 | 60                                   | 72                                 | 71                                  | 71                                        | 38                                           |
| Gene count                                          | 4303                                 | 4207                               | 2480                                | 7001                                      | 3503                                         |
| Protein coding genes                                | 4238                                 | 4145                               | 2415                                | 6907                                      | 3438                                         |
| 16S rRNA                                            | 2                                    | 1                                  | 3                                   | 6                                         | 3                                            |
| Protein coding genes<br>with function<br>prediction | 3471                                 | 3205                               | 1931                                | 4913                                      | 2711                                         |
| with enzymes                                        | 1234                                 | 1000                               | 786                                 | 1393                                      | 905                                          |
| with KEGG pathways                                  | 1281                                 | 1121                               | 817                                 | 1653                                      | 962                                          |
| with KEGG orthology                                 | 2235                                 | 1907                               | 1305                                | 2798                                      | 1821                                         |
| with COG                                            | 2915                                 | 2687                               | 1710                                | 4206                                      | 2314                                         |
| with Pfam                                           | 3582                                 | 3359                               | 2014                                | 5100                                      | 2850                                         |
| Horizontally<br>transferred count<br>(percent %)    | 417 (9.69)                           | 185 (4.4)                          | 122 (1.74)                          | 25 (1.01)                                 | 57 (1.63)                                    |
| JGI Taxon ID                                        | 2619618817                           | 2545824564                         | 2540341240                          | 2546826724                                | 2528768230                                   |
| NCBI taxon ID                                       | 1305734                              | 1304865                            | 1305732                             | 1305730                                   | 1305836                                      |
| Sequencing status                                   | Permanent draft                      | Permanent draft                    | Permanent draft                     | Permanent draft                           | Permanent draft                              |
| Release date                                        | 30/06/2015                           | 13/11/2013                         | 24/09/2013                          | 02/12/2013                                | 08/08/2013                                   |
| High quality                                        | Yes                                  | Yes                                | Yes                                 | Yes                                       | Yes                                          |
| Bioproject accession                                | PRJNA195644                          | PRJNA195883                        | PRJNA195886                         | PRJNA195879                               | PRJNA195884                                  |

environments (Irgens, Gosink and Staley 1996; Yu et al. 2008; Margesin et al. 2012; Wang et al., 2015, 2016; Yan, Xiao and Zhang 2016).

### Genome comparisons and cold adaptation genes

All five organisms possess genes known to be important in cold adaptation and cold growth including cold shock proteins, RNA helicases, osmotic and oxidative stress, carotenoid synthesis, translation factors and membrane and peptidoglycan modifications (Table 3). Although the presence of these genes is not unique to psychrophiles, we also found them to be present in mesophiles, their abundance was higher in the cryophiles in many cases. *Polaromonas* Eur3 1.2.1 possesses 13 copies of universal stress protein (UspA family) genes, produced in response to numerous environmental stressors (Kvint et al. 2003), and 12 copies of Na<sup>+</sup>/H<sup>+</sup> antiporters. While also present in mesophilic *Polaromonas* strains, we found the MnhD subunit of Na<sup>+</sup>/H<sup>+</sup> antiporters to be higher in copy number in *Polaromonas* sp. Eur3 1.2.1 (six) than in mesophilic relatives (one/two) (Fig. 1A). Similarly, a Na<sup>+</sup>/melibiose symporter was higher in gene abundance in *Paenisporosarcina* sp. Eur1 9.01.10 than mesophiles (Fig. 1C). *Kocuria* sp. KROCY2, able to grow in up to 19% salt, possesses nine copies of choline-glycine betaine transporter (Table 3), for uptake of the compatible solute glycine betaine, several more than the mesophiles we used in comparative analyses (Fig. 1B). Four of the five cryophiles also possess the genes for synthesis of trehalose, another well-established compatible solute; 10 copies of the first enzyme in trehalose synthesis, trehalose-6-phosphate synthase, are found in the genome of *Actinotalea* sp. KRM CY2 (Table 3). Trehalose and glycine betaine are important compatible solutes in cold adapted organisms, and along with sodium transporters, have roles in osmoregulation and stability

(Thomas, Kumar and Cavicchioli 2001; Doyle et al. 2012). Salt tolerance would be necessary for survival in permafrost habitats consisting of thin films of salty water. The permafrost cryophilic and halotolerant *Planococcus halocryophilus* is also known to have multiple copies of genes involved in glycine betaine transport (Mykytczuk et al. 2013).

All five strains have multiple copies of superfamily II DNA/RNA helicases, which includes the DEAD box helicases, shown to be crucial for stabilizing RNA at lower temperatures (Kuhn 2012). In addition, most cryophiles possessed toxin/antitoxin (TA) modules, with both *Actinotalea* sp. KRM CY2 and *Methylobacterium* sp. EUR3 AL-11 having copies of genes for TA systems not seen in their mesophilic counterparts (Fig. 1D and E). TA systems are important regulators of persistence and stress responses in certain bacteria, including *Mycobacterium tuberculosis* and *Escherichia coli* (Tiwari et al. 2015; Sauert et al. 2016), and one such system was found to be strongly induced at -10°C in *Planococcus halocryophilus* (Raymond-Bouchard et al. 2017). *Paenisporosarcina* sp. Eur1 9.01.10 and *Actinotalea* sp. KRM CY2 both have higher copy numbers of the DNA binding transcriptional regulators of the LacI/PurR family than the mesophiles we analyzed (Fig. 1C and E). This family contains several members and includes repressors of the lactose operon, purine nucleotide synthesis and trehalose operon. Interestingly, transposase gene numbers were higher in abundance in four of the five strains, *Polaromonas* sp. Eur3 1.2.1, *Kocuria* sp. KROCY2, *Actinotalea* sp. KRM CY2 and *Methylobacterium* sp. EUR3 AL-11 compared to their respective mesophilic relatives (Fig. 1A, B, D and E). Transposase activity has been shown to be linked to the stress response, and therefore, may be a mechanism in which these organisms gain genomic plasticity and a selective advantage necessary to survive and colonize extreme cold environments (de Saro et al. 2013; Shen et al. 2014). Increases in gene

**Table 3.** Gene functions and COG or Enzyme Commission (EC) categories present in psychrophilic genomes with known or predicted roles in cold adaptation and growth.

| Category and Gene name                                          | COG/EC ID                                | Polaromonas<br>Eur3 1.2.1 | Actinotalea<br>KRMCY2 | Kocuria<br>KROCY2 | Methylobacterium<br>EUR3 AL-11 | Paenisporsarcina<br>Eur1 9.01.10 |
|-----------------------------------------------------------------|------------------------------------------|---------------------------|-----------------------|-------------------|--------------------------------|----------------------------------|
| <b>Cold shock, stress and HSP proteins</b>                      |                                          |                           |                       |                   |                                |                                  |
| Cold shock protein, CspA family                                 | COG1278                                  | 1                         | 1                     | 2                 | 6                              | 4                                |
| Universal stress protein, UspA family                           | COG0589                                  | 13                        | 0                     | 1                 | 4                              | 3                                |
| Co-chaperonin GroES (HSP10)                                     | COG0234                                  | 1                         | 2                     | 1                 | 1                              | 1                                |
| Chaperonin GroEL (HSP60 family)                                 | COG0459                                  | 2                         | 1                     | 2                 | 1                              | 1                                |
| Molecular chaperone DnaK (HSP70)                                | COG0443                                  | 3                         | 0                     | 1                 | 2                              | 1                                |
| Molecular chaperone IbpA, HSP20 family                          | COG0071                                  | 5                         | 1                     | 0                 | 4                              | 0                                |
| Molecular chaperone, HSP90 family                               | COG0326                                  | 1                         | 1                     | 0                 | 1                              | 0                                |
| Molecular chaperone GrpE (heat shock protein)                   | COG0576                                  | 1                         | 3                     | 1                 | 1                              | 1                                |
| Ribosomal 50S subunit-recycling heat shock protein              | COG1188                                  | 1                         | 2                     | 1                 | 1                              | 1                                |
| <b>DNA replication and repair</b>                               |                                          |                           |                       |                   |                                |                                  |
| DNA gyrase/topoisomerase I, subunits A&B                        | COG0187; 0188                            | 4                         | 4                     | 3                 | 4                              | 4                                |
| Recombinational DNA repair protein RecR                         | COG0353                                  | 1                         | 0                     | 1                 | 1                              | 1                                |
| RecA-superfamily ATPase, KaiC/GvpD/RAD55 family                 | COG0467                                  | 1                         | 1                     | 0                 | 2                              | 0                                |
| RecA/RadA recombinase                                           | COG0468                                  | 1                         | 2                     | 1                 | 1                              | 1                                |
| DNA repair ATPase RecN                                          | COG0497                                  | 1                         | 6                     | 1                 | 1                              | 1                                |
| Superfamily II DNA helicase RecQ                                | COG0514                                  | 1                         | 0                     | 2                 | 2                              | 2                                |
| Rad3-related DNA helicase                                       | COG1199                                  | 3                         | 4                     | 1                 | 0                              | 2                                |
| <b>Membrane and peptidoglycan alteration</b>                    |                                          |                           |                       |                   |                                |                                  |
| 3-oxoacyl-(acyl-carrier-protein) synthase                       | COG0304                                  | 2                         | 0                     | 4                 | 4                              | 1                                |
| 3-oxoacyl-[acyl-carrier-protein] synthase III (KASIII)          | COG0332                                  | 1                         | 1                     | 3                 | 2                              | 1                                |
| 3-oxoacyl-[acyl-carrier-protein] reductase                      | EC:1.1.1.100                             | 12                        | 3                     | 3                 | 6                              | 5                                |
| Glycosyltransferase involved in cell wall biosynthesis          | COG0438; 0463                            | 17                        | 10                    | 19                | 39                             | 7                                |
| 3-hydroxyacyl-CoA dehydrogenase                                 | COG1250                                  | 8                         | 1                     | 1                 | 5                              | 4                                |
| Fatty-acid desaturase                                           | COG1398; 3239                            | 1                         | 1                     | 1                 | 0                              | 1                                |
| D-alanyl-D-alanine carboxypeptidase                             | COG1686; 2027                            | 2                         | 1                     | 1                 | 4                              | 3                                |
| <b>Carotenoid biosynthesis</b>                                  |                                          |                           |                       |                   |                                |                                  |
| Phytoene dehydrogenase-related protein                          | COG1233                                  | 0                         | 2                     | 3                 | 4                              | 1                                |
| Phytoene/squalene synthetase                                    | COG1562                                  | 2                         | 1                     | 1                 | 4                              | 1                                |
| <b>Polysaccharide capsule</b>                                   |                                          |                           |                       |                   |                                |                                  |
| Capsular polysaccharide biosyn. protein EpsC                    | COG1086                                  | 1                         | 0                     | 1                 | 1                              | 1                                |
| Capsule polysaccharide export protein                           | COG3524                                  | 0                         | 0                     | 0                 | 3                              | 0                                |
| Capsular polysaccharide biosynthesis protein                    | COG3944; 4421                            | 0                         | 0                     | 3                 | 1                              | 1                                |
| Exopolysaccharide biosynthesis protein                          | COG4632                                  | 0                         | 1                     | 0                 | 0                              | 0                                |
| <b>Osmotic stress</b>                                           |                                          |                           |                       |                   |                                |                                  |
| ABC proline/glycine betaine transport, ATPase component         | COG1125; 4175                            | 1                         | 1                     | 2                 | 2                              | 1                                |
| ABC proline/glycine betaine transport, permease                 | COG1174; 4176                            | 2                         | 0                     | 4                 | 3                              | 1                                |
| Choline-glycine betaine transporter                             | COG1292                                  | 0                         | 0                     | 9                 | 0                              | 1                                |
| Osmoprotectant binding protein                                  | COG1732                                  | 1                         | 0                     | 3                 | 1                              | 1                                |
| Choline dehydrogenase or related flavoprotein                   | COG2303                                  | 1                         | 1                     | 1                 | 7                              | 1                                |
| Trehalose-6-phosphate synthase                                  | COG0380                                  | 2                         | 10                    | 1                 | 1                              | 0                                |
| Trehalose-6-phosphatase                                         | COG1877                                  | 1                         | 1                     | 1                 | 1                              | 0                                |
| Maltooligosyltrehalose synthase                                 | COG3280                                  | 0                         | 1                     | 1                 | 1                              | 0                                |
| Na <sup>+</sup> /proline symporter                              | COG0591                                  | 1                         | 1                     | 1                 | 2                              | 3                                |
| Na <sup>+</sup> /H <sup>+</sup> antiporters                     | COGs: 3004; 1055; 0025; 0651; 1009; 1320 | 12                        | 5                     | 7                 | 11                             | 5                                |
| <b>Oxidative stress</b>                                         |                                          |                           |                       |                   |                                |                                  |
| Catalase                                                        | COG0753                                  | 2                         | 0                     | 2                 | 1                              | 3                                |
| Peroxiredoxin                                                   | COG0678; 1225                            | 3                         | 3                     | 2                 | 4                              | 3                                |
| Glutathione peroxidase                                          | COG0386                                  | 2                         | 1                     | 1                 | 2                              | 1                                |
| Spermidine synthase                                             | COG0421                                  | 1                         | 1                     | 0                 | 0                              | 1                                |
| Thioredoxin reductase                                           | COG0492                                  | 2                         | 1                     | 2                 | 4                              | 5                                |
| Glyoxylase or related hydrolase, $\beta$ -lactamase superfam II | COG0491                                  | 6                         | 4                     | 4                 | 9                              | 7                                |
| <b>Toxin/Antitoxin modules</b>                                  |                                          |                           |                       |                   |                                |                                  |
| Ser/Thr kinase RdoA, MazF antagonist                            | COG2334                                  | 2                         | 1                     | 0                 | 2                              | 1                                |

Table 3. Continued

| Category and Gene name                              | COG/EC ID     | <i>Polaromonas</i><br>Eur3 1.2.1 | <i>Actinotalea</i><br>KRM CY2 | <i>Kocuria</i><br>KROCY2 | <i>Methylobacterium</i><br>EUR3 AL-11 | <i>Paenisporosarcina</i><br>Eur1 9.01.10 |
|-----------------------------------------------------|---------------|----------------------------------|-------------------------------|--------------------------|---------------------------------------|------------------------------------------|
| Antitoxin component of MazEF                        | COG2336       | 1                                | 1                             | 0                        | 0                                     | 0                                        |
| mRNA-interferase, toxin component of MazEF          | COG2337       | 2                                | 1                             | 0                        | 1                                     | 1                                        |
| mRNA interferase YafQ, toxin component of YafQ-DinJ | COG3041       | 2                                | 1                             | 0                        | 2                                     | 0                                        |
| Antitoxin component of RelBE or YafQ-DinJ           | COG3077       | 1                                | 0                             | 0                        | 2                                     | 0                                        |
| <b>Translation and transcription factors</b>        |               |                                  |                               |                          |                                       |                                          |
| tRNA-dihydrouridine synthase                        | COG0042       | 3                                | 1                             | 1                        | 2                                     | 2                                        |
| tRNA A37 threonylcarbamoyladenine dehydratase       | COG1179       | 1                                | 0                             | 0                        | 0                                     | 1                                        |
| Translation elongation factor EF-Tu, GTPase         | COG0050       | 2                                | 1                             | 1                        | 2                                     | 1                                        |
| Translation elongation factor EF-G, GTPase          | COG0480       | 3                                | 1                             | 1                        | 1                                     | 2                                        |
| Translation initiation factor IF-2, GTPase          | COG0532       | 1                                | 1                             | 1                        | 1                                     | 1                                        |
| Translation initiation factor IF-3                  | COG0290       | 1                                | 1                             | 1                        | 1                                     | 1                                        |
| Transcription antitermination factor NusA           | COG0195       | 1                                | 1                             | 1                        | 1                                     | 1                                        |
| Transcription termination factor NusB               | COG0781       | 1                                | 2                             | 1                        | 1                                     | 1                                        |
| Superfamily II DNA and RNA helicase                 | COG0513; 1061 | 7                                | 4                             | 5                        | 6                                     | 3                                        |
| Superfamily II DNA or RNA helicase, SNF2            | COG0553       | 0                                | 0                             | 1                        | 0                                     | 2                                        |
| Superfamily II RNA helicase                         | COG4581       | 0                                | 2                             | 1                        | 0                                     | 0                                        |

copy numbers have also been theorized to be an adaptive feature in and of itself by offering an advantage through selective expression of cold or hot adapted gene copies at different temperatures (Maki, Yoneta and Takada 2006; Mykytczuk et al. 2013). This is believed to confer advantages during cold growth given that selectively upregulated gene copies are likely to function better at their induced temperature, and thus allows organisms to have an expanded growth temperature range, such as *P. halocryophilus*, which grows from  $-15^{\circ}\text{C}$  to  $37^{\circ}\text{C}$ .

### AA adaptations

To examine AA substitutions that could favor increased flexibility, we performed genome wide comparative AA analyses using the predicted protein sequences for each cryophile. We determined the number of significantly cold or hot adapted genes in each cryophilic genome for specific AA indices associated with cold adaptation (Fig. 2 and Table S3, Supporting Information). Previous studies have used the ratio of cold/hot proteins as a standard to determine cold adaptation for a given trait and deemed those with cold/hot ratios  $>1$ , signifying enrichment of cold adapted proteins, as 'cold adapted' (Ayala-del-Río et al. 2010; Mykytczuk et al. 2013). For comparative purposes and as a control to check if these cold/hot ratios are specific to cold adaptation in cryophiles, we also determined the number of hot and cold adapted genes and cold/hot ratios for two mesophiles for each cryophile (Fig. 2 and Fig. S2, Supporting Information). As these results highlight, cold/hot ratios of  $>1$  can be seen in all of the mesophiles for certain traits, and we therefore argue that using a ratio cutoff of 1 is not enough on its own to indicate cold adaptation for a given trait in psychrophilic genomes. We instead focused on determining significant differences in proportions of hot and cold genes in the cryophiles vs the mesophiles as determined by chi-square analysis with Bonferroni correction ( $P \leq 0.0167$ ) used to correct for multiple comparisons (Fig. 2; Figs S2 and S3, Supporting Information). Of note, most of the proteins in both cryophile and mesophile genomes were classified as neutral with no significant changes in AA content (Fig. S3, Supporting Information).

Cold/hot ratios were therefore determined for the remaining proteins that showed significant changes and could be classified as hot or cold adapted.

While we did not find the proportions of cold and hot adapted genes in the cryophilic genomes to be significantly different from the mesophiles for many of the amino acid traits, there were noteworthy exceptions. *Polaromonas* sp. Eur3 1.2.1 had significantly higher and lower proportions of cold and hot adapted genes (Table S3, Supporting Information), respectively, for the index proline than the mesophiles, with an overall much higher cold/hot ratio (Fig. 2A), indicative that more cryophilic proteins possess overall fewer proline residues than their mesophilic counterparts. *Actinotalea* sp. KRM CY2 was also significantly cold adapted for proline (Fig. 2C). Since prolines are covalently bonded to the nitrogen atom of the peptide group, they impose constraint on rotations of the peptide backbone and create rigid kinks in peptide chains, thus contributing to overall reduced flexibility of proteins. A reduction in proline residues has also been observed, when compared to mesophiles, in the genomes of the cold marine bacteria *Shewanella halifaxensis* and *Shewanella sediminis* (Zhao et al. 2010) and in a number of cold adapted enzymes, including the psychrophilic  $\alpha$ -amylase from *Alteromonas haloplanctis* and the 3-isopropylmalate dehydrogenase from the eurypsychrophile bacterium *Vibrio* sp. 15 (Wallon et al. 1997; Aghajari et al. 1998).

Both *Kocuria* sp. KROCY2 and *Actinotalea* sp. KRM CY2 had higher proportions of cold adapted proteins for serine (i.e. more serine residues) than the mesophiles, while *Actinotalea* sp. KRM CY2 and *Methylobacterium* sp. EUR3 AL-11 had significantly higher proportions of cold adapted proteins for glycine (more glycine) (Fig. 2B, C and D). Due to its small size, glycine provides more conformational freedom, thus increasing flexibility, and serine, as a polar uncharged amino acid, may compensate partly for the general reduction in charged residues in psychrophilic proteins (Saunders et al. 2003). Serine and glycine have been shown to be higher in a number of psychrophilic proteins, including an Antarctic citrate synthase (Russell et al. 1998) and a DEAD-box RNA helicase (Linding et al. 2003). Increases in serine residues is one of the more commonly observed traits

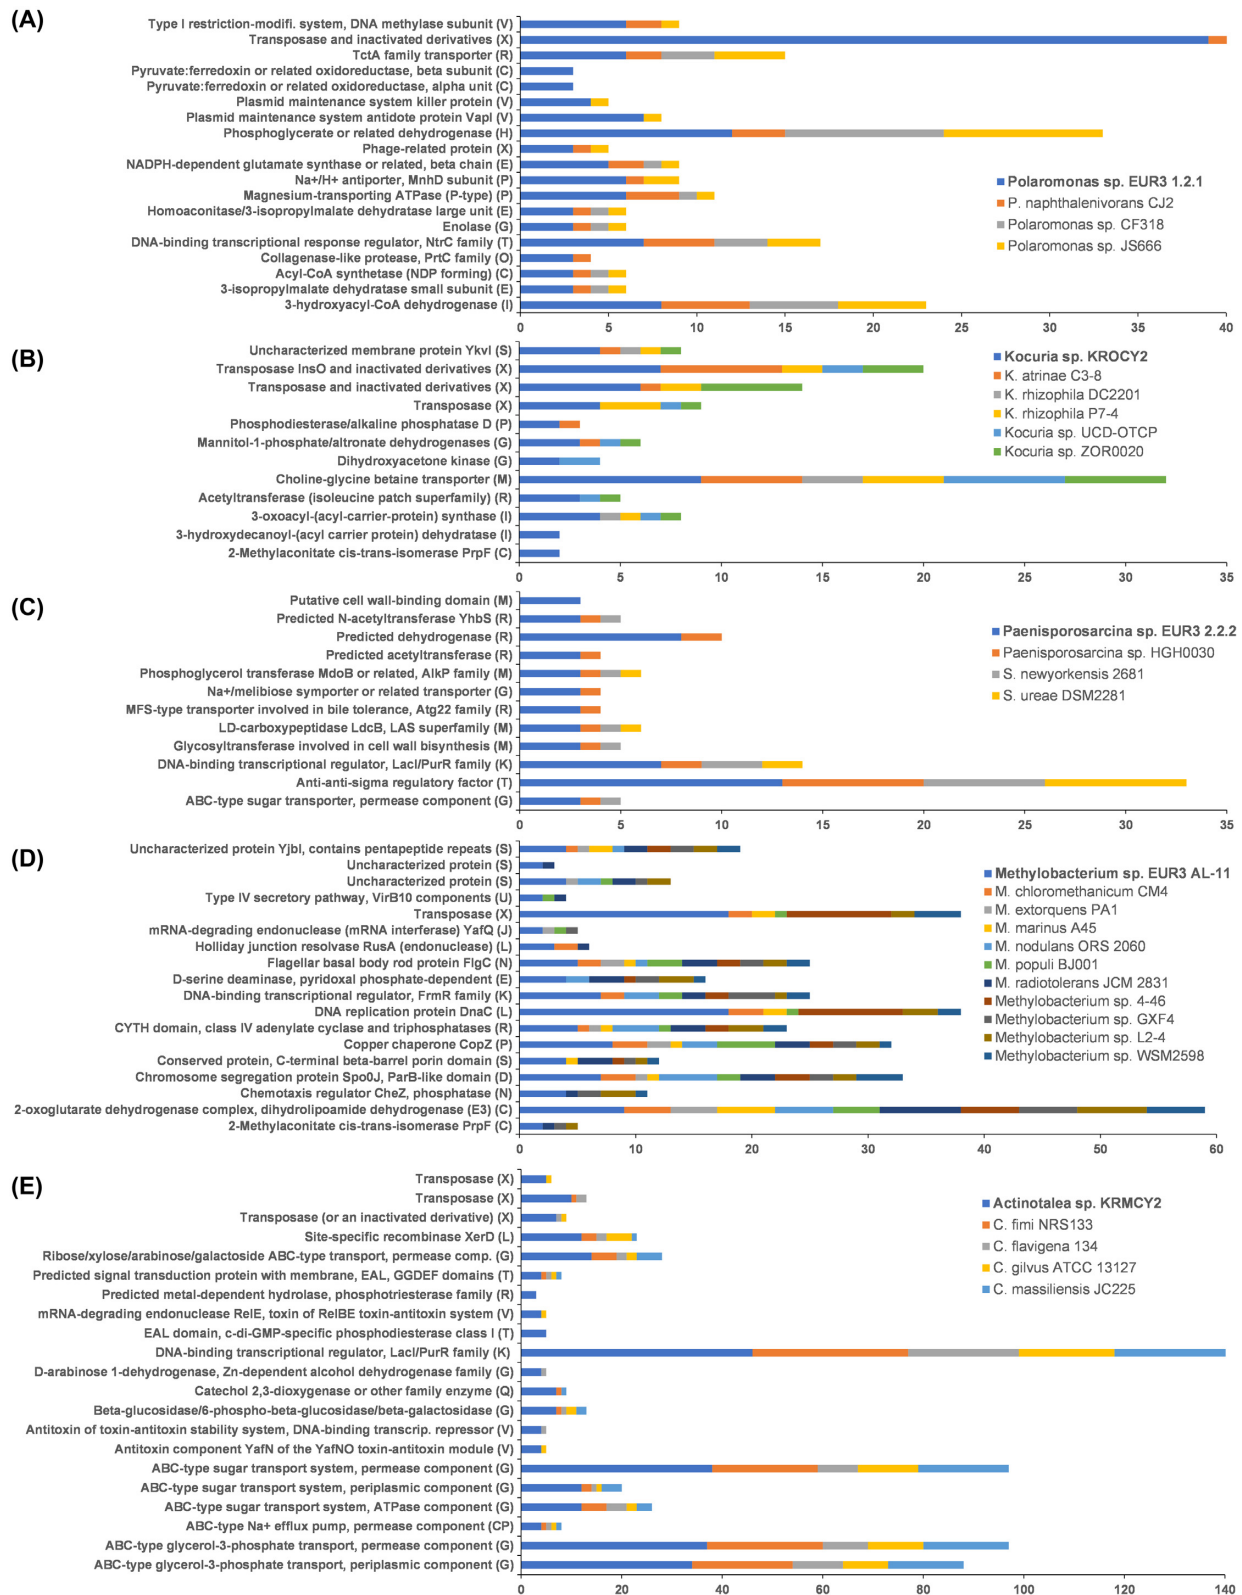

**Figure 1.** COG categories and gene functions with higher abundances of copies in the cryophilic genomes when compared to mesophiles. **A)** *Polaromonas* sp. Eur3 1.2.1; **B)** *Kocuria* sp. KROCY2; **C)** *Paenisporosarcina* sp. Eur1 9.01.10; **D)** *Methylobacterium* sp. EUR3 AL-11; and **E)** *Actinotalea* sp. KRMCY2. The blue column closest to the Y-axis represents copy numbers for the cryophiles in each case. Letters for the COG categories are given in parenthesis after the gene description: **C)** Energy production and conversion; **D)** Cell cycle control, cell division, chromosome partitioning; **E)** Amino acid transport and metabolism; **G)** Carbohydrate transport and metabolism; **H)** Coenzyme transport and metabolism; **I)** Lipid transport and metabolism; **J)** Translation, ribosomal structure and biogenesis; **K)** Transcription; **L)** Replication, recombination and repair; **M)** Cell wall/membrane/envelope biogenesis; **N)** Cell motility **O)** Post-translational modification, protein turnover, and chaperones; **P)** Inorganic ion transport and metabolism; **R)** General function prediction only; **S)** Function unknown **T)** Signal transduction mechanisms; **U)** Intracellular trafficking, secretion, and vesicular transport; **V)** Defense mechanisms; **X)** Mobilome: prophages, transposons.



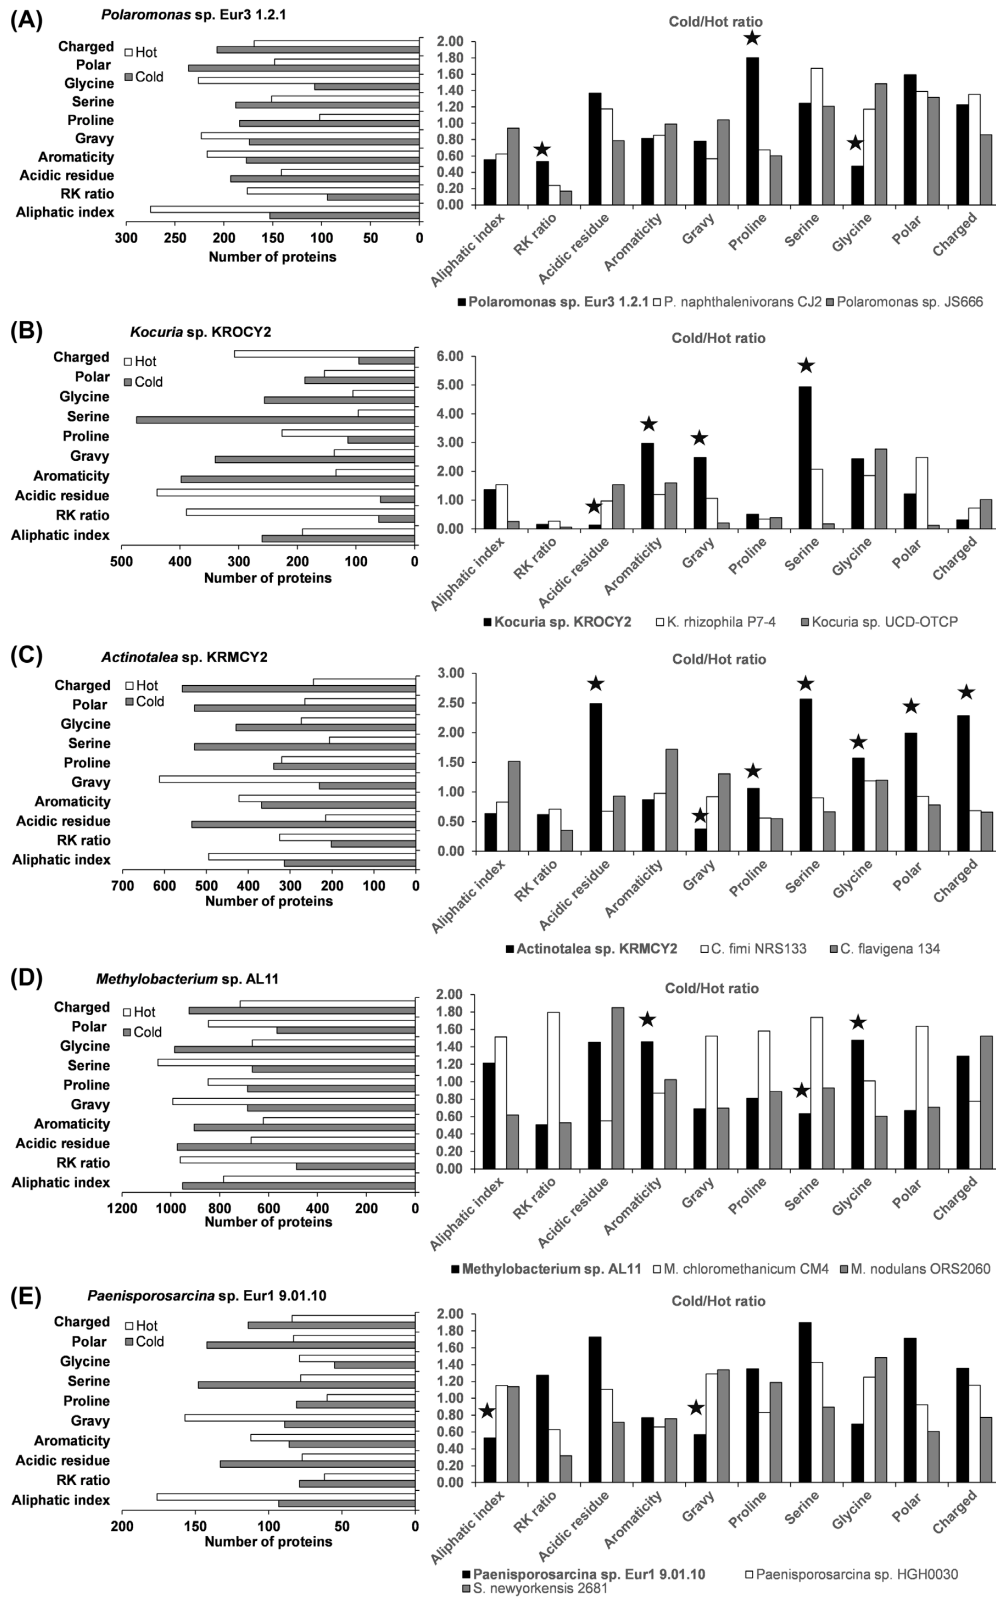

Figure 2. Amino acid traits of cold adaptation in cryophilic proteins. Left side graphs: significantly ( $P < 0.05$ ) hot and cold adapted proteins identified in each cryophile (A-E) for each amino acid trait measured: aliphatic index, R/K ratio, acidic residues, aromaticity, GRAVY and proline, serine, glycine, polar and charged residues. Right side graphs: ratio of cold/hot adapted proteins identified in each cryophile (name bolded; black bar) and in two mesophilic relatives of each cryophile. Proportions of cold adapted proteins that were significantly different in the cryophile genome when compared to both mesophilic genomes are starred.

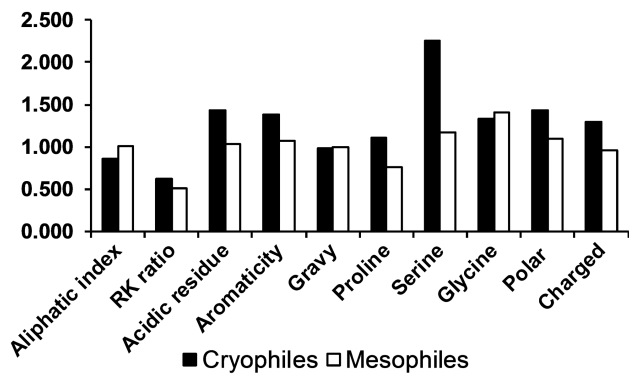

Figure 3. Average ratio of cold/hot adapted proteins for all cryophiles and all mesophiles for each amino acid trait measured.

and has also been found in a uracil-DNA-N-glycosylate (Ræder et al. 2008), a thermolysin (Adekoya et al. 2006), and the genomes of *Colwellia psychrerythraea* and marine *Glaciocola* species (Méthé et al. 2005; Qin et al. 2013). Significant cold adaptation was also observed for aromaticity (fewer aromatic residues) in *Kocuria* sp. KROCY2 and *Methylobacterium* sp. EUR3 AL-11, and for the R/K ratio, with an overall lower number of arginines to lysines, in *Polaromonas* sp. Eur3 1.2.1. The bacterial lipase from the Antarctic psychrophile *P. immobilis* B10 features a very small number of aromatic-aromatic interactions (Arpigny, Lamotte and Gerdard 1997), and proteins present at the cell surface of *Planococcus halocryophilus* at  $-10^{\circ}\text{C}$  have significantly fewer aromatic residues than surface proteins present at higher temperatures (Ronholm et al. 2015).

In addition to serine and glycine, *Actinotalea* sp. KRMCY2 showed the greatest amount of significantly cold adapted indices with six out of the 10 being significantly higher for cold adaptation from the mesophiles. However, for the other cryophiles, only a few of the indices showed evidence of cold adaptation, and in the case of *Paenisporosarcina* sp. Eur1 9.01.10, none showed significant cold adaptation (Fig. 2E). Many members of the genera *Paenisporosarcina* and *Sporosarcina* are psychrophilic, as discussed above, and therefore it is possible that most members of these genera possess characteristics of cold adaptation, even in those characterized as mesophiles in the literature. This would explain why little to no significant cold adaptation is detected in these organisms.

By comparing the average cryophile ratios for each amino acid adaptive trait with the average of the mesophile ratios for those traits, we were able to highlight some differences in several amino acid indices. A comparison of all cryophiles with all mesophiles revealed higher average ratios of cold/hot adapted genes in the cryophiles for serine, and slightly higher for acidic, proline, polar, charged and R/K indices (Fig. 3 and Table S3, Supporting Information). We did not, however, find these results to be significantly different by t-test ( $P \leq 0.05$ ), though the results were close for proline ( $P = 0.07$ ), serine ( $P = 0.1$ ) and acidic residues ( $P = 0.1$ ). This lack of significant difference is in large part the result of noticeable variation in cold/hot ratios between the different genera and phyla for the specific amino acid indices we studied. Amino acid cold adaptive strategies may be taxa specific and vary greatly between individual proteins. Indeed, to date, not every amino acid feature discussed here has been found in a single genome or cold-active protein, rather most tend to possess only a few of these traits (Rodrigues and Tiedje 2008). Contradictory findings have also been reported with certain amino acid changes, such as

glycine, appearing to be increased in some psychrophilic proteins (Russell et al. 1998; Linding et al. 2003) but decreased in certain psychrophilic genomes (Zhao et al. 2010). Thus, the adaptive strategies employed by psychrophiles may vary from organism to organism. These adaptations may not be present in all psychrophiles, as is the case with *Desulfotalea psychrophila*, which did not show detectable amino acid substitutions indicative of cold adaptation in its genome (Rabus et al. 2004), and in our case with *Paenisporosarcina* sp. Eur1 9.01.10. The cold-active isocitrate dehydrogenase from psychrophilic *Colwellia maris* also did not appear to show any characteristic amino acid changes associated with psychrophilic proteins (Watanabe et al. 2005).

Proteins with only a single or very few amino acid changes, which is enough to have significant impacts on function, would not be as easily detectable in these large-scale analyses since a single change is less likely to result in a protein being detected as significantly cold adapted when compared to mesophiles. In addition, changes may, in some cases, only occur in a subset of proteins and not result of large-scale changes across the entire genome/proteome. The overall large number of proteins in this study that were neither cold or hot adapted would add weight to this theory. In *Psychrobacter arcticus*, noted adaptations appeared to be more prevalent in proteins involved in cell growth and reproduction (Ayala-del-Río et al. 2010). Changes may also be conformational in nature, affecting secondary, tertiary and quaternary structure, either through changes in location of the amino acids in the sequence, which would not affect overall amino acid counts, or through one or two amino acid changes, which would be difficult to detect in this analysis.

Lastly, and perhaps most importantly, the specific location of the amino acids, not simply total numbers, may be especially important. The citrate synthase from Antarctic strain DS2-3R showed a reduction in salt bridges and proline residues specifically in the loop regions of the protein, while increases in glycine and serine occurred close to catalytic sites (Russell et al. 1998). In the psychrophilic *Alteromonas haloplanctis*  $\alpha$ -amylase, it is the core of the protein that shows reduced numbers of proline and arginine (Aghajari et al. 1998). Nevertheless, while we did not find significantly conserved traits across the cryophiles, nor observed noticeable differences in cold adaptation between cryophiles for many amino acid features, our results do highlight noteworthy trends in amino acid properties of cryophilic proteins, and did identify traits that are significantly different from mesophilic relatives for several of the cryophiles, especially with regards to glycine, proline and serine. Changes in these amino acids are amongst the most consistently observed cold adaptive traits in studies focusing on cold adaptation of psychrophilic proteins, and these changes seem to span broad phyla.

## CONCLUSION

We found evidence for the presence of many cold adaptation genes in the genomes of cryophiles reported in this study, as well as genomic redundancy (higher gene copy numbers), theorized to be an important feature of cold adapted organisms. We identified significant cold adaptation in the genomes, to maintain protein flexibility at low temperatures, in four of the five cryophiles for a subset of the amino acid traits we studied, including proline, glycine, serine and aromaticity. Comparing all cryophile genomes from our study to all mesophile genomes in our database, we found trends favoring lower proline and acidic residues, and higher serine content in cryophilic proteins. It is possible that changes in content of these specific amino acids may be especially important to increase protein flexibility during

subzero growth. Further comparisons between cryophiles, psychrophiles and mesophiles would need to be done to determine if this is the case. On the whole, however, we could not easily detect cold adaptations on a genome-wide scale for many of the amino acid indices we investigated, and we found a significant degree of variability between the genera we studied. This may indicate that, while some overlap exists, overall, cold-adapted microbes use different approaches to adapt to low temperatures. In addition, since amino acid adaptations may be specific to certain subsets or categories of proteins, we believe that individual comparative analyses focusing on single proteins and taking into account not only total amino acid numbers, but the location of specific amino acids within the sequence, the overall potential conformation of the protein, and, if possible, functional assays, are more likely to provide an accurate overall representation of cold adaptation in psychrophilic proteins. Overall, this study has increased our understanding of the genetic basis of cold adaptation in permafrost microbes, and thus helps up better understand how these organisms behave and grow at subzero temperatures.

## SUPPLEMENTARY DATA

Supplementary data are available at [FEMSEC](#) online.

## ACKNOWLEDGEMENTS

Sequencing was performed as part of a U.S. Department of Energy Joint Genome Institute Community Sequencing Program Project (Quartely; ID 1015712). Thanks to Nicole Shapiro, Tanja Woyke, Marcel Huntemann, James Han, Amy Chen, Nikos Kyrpides, Victor Markowitz, Krishna Palaniappan, Natalia Ivanova, Natalia Mikhailova, Galina Ovchinnikova, Andrew Schaumberg, Amrita Pati, Dimitrios Stamatis, Tatiparthi Reddy, Henrik P. Nordberg, Michael N. Cantor, and Susan X. Hua of JGI.

## FUNDING

This work was supported by fellowships from the Natural Sciences and Engineering Research Council (NSERC) CREATE Canadian Astrobiology Training Program (CATP) and NSERC Canadian Graduate Scholarship to IRB, and NSERC Discover Grant Program, Northern Research Supplement grant, and a Polar Continental Shelf Project grant to LGW. The work conducted by JGI is supported by the Office of Science of the U.S. Department of Energy under Contract No. DE-AC02-05CH11231.

**Conflict of interest.** None declared.

## REFERENCES

Adekoya OA, Helland R, Willassen NP *et al.* Comparative sequence and structure analysis reveal features of cold adaptation of an enzyme in the thermolysin family. *Proteins Struct Funct Genet* 2006;**62**:435–49.

Aghajari N, Feller G, Gerday C *et al.* Structures of the psychrophilic alteromonas haloplanctis alpha-amylase give insights into cold adaptation at a molecular level. *Structure* 1998;**6**:1503–16.

Arpigny JL, Lamotte J, Gerday C. Molecular adaptation to cold of an antarctic bacterial lipase. *J Mol Catal B Enzym* 1997;**3**:29–35.

Ayala-del-Río HL, Chain PS, Grzymalski JJ *et al.* The genome sequence of *Psychrobacter arcticus* 273–4, a psychroactive Siberian permafrost bacterium, reveals mechanisms for

adaptation to low-temperature growth. *Appl Environ Microbiol* 2010;**76**:2304–12.

Bakermans C, Bergholz PW, Rodrigues DF *et al.* Genomic and expression analyses of cold-adapted microorganisms. In: Miller RV, Whyte LG (eds). *Polar Microbiology: Life in a Deep Freeze*. Washington, DC, USA: ASM Press, 2012, 126–55.

Bennett S. Solexa Ltd. *Pharmacogenomics* 2004;**5**:433–8.

Camacho C, Coulouris G, Avagyan V *et al.* BLAST plus: architecture and applications. *BMC Bioinformatics* 2009;**10**:1.

Cavicchioli R. Cold-adapted archaea. *Nat Rev Microbiol* 2006;**4**:331–43.

Cavicchioli R. On the concept of a psychrophile. *ISME J* 2016;**10**:793–5.

Chin C-S, Alexander DH, Marks P *et al.* Nonhybrid, finished microbial genome assemblies from long-read SMRT sequencing data. *Nat Methods* 2013;**10**:563–9.

Collins T, Gerday C, Feller G. Xylanases, xylanase families and extremophilic xylanases. *FEMS Microbiol Rev* 2005;**29**:3–23.

De Maayer P, Anderson D, Cary C *et al.* Some like it cold: understanding the survival strategies of psychrophiles. *EMBO Rep* 2014;**15**:508–17.

De Saro FJL, Gómez MJ, González-Tortuero E *et al.* The Dynamic Genomes of Acidophiles. In: Seckbach J, Oren A, Stan-Lotter H (eds). *Polyextremophiles: Life Under Multiple Forms of Stress*. Dordrecht, The Netherlands: Springer, 2013, 83–97.

Doyle S, Dieser M, Broemsen E *et al.* General characteristics of cold-adapted microorganisms. In: Miller RV, Whyte LG (eds). *Polar Microbiology: Life in a Deep Freeze*. Washington, DC, USA: ASM Press, 2012, 103–25.

Feller G, Gerday C. Psychrophilic enzymes: hot topics in cold adaptation. *Nat Rev Microbiol* 2003;**1**:200–8.

Feller G, Lonhienne T, Deroanne C *et al.* Purification, characterization, and nucleotide sequence of the thermolabile alpha amylase from the antarctic psychrotroph alteromonas haloplanctis A23. *J Biol Chem* 1992;**267**:5217–21.

Georlette D, Jónsson ZO, Van Petegem F *et al.* A DNA ligase from the psychrophile *Pseudoalteromonas haloplanctis* gives insights into the adaptation of proteins to low temperatures. *Eur J Biochem* 2000;**267**:3502–12.

Gilichinsky D, Rivkina E, Shcherbakova V *et al.* Supercooled water brines within permafrost—an unknown ecological niche for microorganisms: a model for astrobiology. *Astrobiology* 2003;**3**:331–41.

Gilichinsky DA, Soina VS, Petrova MA. Cryoprotective properties of water in the Earth cryolithosphere and its role in exobiology. *Orig Life Evol Biosph* 1993;**23**:65–75.

Gnerre S, Maccallum I, Przybylski D *et al.* High-quality draft assemblies of mammalian genomes from massively parallel sequence data. *Proc Natl Acad Sci USA* 2011;**108**:1513–8.

Goordial J, Lamarche G, Lay C *et al.* Left out in the cold: life in cryoenvironments. In: Seckbach J, Oren A, Stan-Lotter H (eds). *Polyextremophiles*. The Netherlands: Springer, 2012, 335–63.

Goordial J, Raymond-Bouchard I, Zolotarov Y *et al.* Cold adaptive traits revealed by comparative genomic analysis of the eurypsychrophile *Rhodococcus* sp. JG3 isolated from high elevation McMurdo Dry Valley permafrost, Antarctica. *FEMS Microbiol Ecol* 2016;**92**:1–11.

Grzymalski JJ, Carter BJ, Delong EF *et al.* Comparative genomics of DNA fragments from six antarctic marine planktonic bacteria comparative genomics of DNA fragments from six antarctic marine planktonic bacteria. *Appl Environ Microbiol* 2006;**72**:1532–41.

- Huston AL, Methe B, Deming JW. Purification, characterization, and sequencing of an extracellular cold-active aminopeptidase produced by marine psychrophile *Colwellia psychrerythraea* strain 34H. *Appl Environ Microbiol* 2004;**70**:3321–8.
- Hyatt D, Chen G-L, Locascio PF et al. Prodigal: prokaryotic gene recognition and translation initiation site identification. *BMC Bioinformatics* 2010;**11**:119.
- Irgens RL, Gosink JJ, Staley JT. *Polaromonas vacuolata* gen. nov., sp. nov., a psychrophilic, marine, gas vacuolate bacterium from antarctica. *Int J Syst Bacteriol* 1996;**46**:822–6.
- Kuhn E. Toward understanding life under subzero conditions: the significance of exploring psychrophilic “cold-shock” proteins. *Astrobiology* 2012;**12**:1078–86.
- Kvint K, Nachin L, Diez A et al. The bacterial universal stress protein: function and regulation. *Curr Opin Microbiol* 2003;**6**:140–5.
- Lacelle D, Radtke K, Clark ID et al. Geomicrobiology and occluded O<sub>2</sub>-CO<sub>2</sub>-Ar gas analyses provide evidence of microbial respiration in ancient terrestrial ground ice. *Earth Planet Sci Lett* 2011;**306**:46–54.
- Li M, Copeland A, Han J. DUK – a fast and efficient Kmer matching tool. *Lawrence Berkeley Natl Lab LBNL Pap LBNL-4516E-Poster p.* 2011, 1–3.
- Linding R, Jensen LJ, Diella F et al. Protein disorder prediction: implications for structural proteomics. *Structure* 2003;**11**:1453–9.
- Lowe TM, Eddy SR. TRNAscan-SE: a program for improved detection of transfer RNA genes in genomic sequence. *Nucleic Acids Res* 1996;**25**:955–64.
- Maki S, Yoneta M, Takada Y. Two isocitrate dehydrogenases from a psychrophilic bacterium, *Colwellia psychrerythraea*. *Extremophiles* 2006;**10**:237–49.
- Margesin R, Spröer C, Zhang DC et al. *Polaromonas glacialis* sp. nov. and *Polaromonas cryoconiti* sp. nov., isolated from alpine glacier cryoconite. *Int J Syst Evol Microbiol* 2012;**62**:2662–8.
- Markowitz VM, Mavromatis K, Ivanova NN et al. IMG ER: a system for microbial genome annotation expert review and curation. *Bioinformatics* 2009;**25**:2271–8.
- Méthé BA, Nelson KE, Deming JW et al. The psychrophilic lifestyle as revealed by the genome sequence of *Colwellia psychrerythraea* 34H through genomic and proteomic analyses. *Proc Natl Acad Sci USA* 2005;**102**:10913–8.
- Metpally RPR, Reddy BVB. Comparative proteome analysis of psychrophilic versus mesophilic bacterial species: insights into the molecular basis of cold adaptation of proteins. *BMC Genomics* 2009;**10**:11.
- Mykytczuk NC, Foote SJ, Omelon CR et al. Bacterial growth at -15°C; molecular insights from the permafrost bacterium *Planococcus halocryophilus* Or1. *ISME J* 2013;**7**:1211–26.
- Nawrocki EP, Eddy SR. Infernal 1.1: 100-fold faster RNA homology searches. *Bioinformatics* 2013;**29**:2933–5.
- Pati A, Ivanova NN, Mikhailova N et al. GenePRIMP: a gene prediction improvement pipeline for prokaryotic genomes. *Nat Methods* 2010;**7**:455–7.
- Pruesse E, Quast C, Knittel K et al. SILVA: a comprehensive online resource for quality checked and aligned ribosomal RNA sequence data compatible with ARB. *Nucleic Acids Res* 2007;**35**:7188–96.
- Qin QL, Xie BB, Yu Y et al. Comparative genomics of the marine bacterial genus *Glaciecola* reveals the high degree of genomic diversity and genomic characteristic for cold adaptation. *Environ Microbiol* 2013;**16**:1642–53.
- Rabus R, Ruepp A, Frickey T et al. The genome of *Desulfotalea psychrophila*, a sulfate-reducing bacterium from permanently cold Arctic sediments. *Environ Microbiol* 2004;**6**:887–902.
- Raymond-Bouchard I, Chourey K, Altshuler I et al. Mechanisms of subzero growth in the cryophile *Planococcus halocryophilus* determined through proteomic analysis. *Environ Microbiol* 2017;**19**:4460–4479.
- Rodrigues DF, Tiedje JM. Coping with our cold planet. *Appl Environ Microbiol* 2008;**74**:1677–86.
- Ronholm J, Raymond-Bouchard I, Creskey M et al. Characterizing the surface-exposed proteome of *Planococcus halocryophilus* during cryophilic growth. *Extremophiles* 2015;**19**:619–29.
- Russell RJ, Gerike U, Danson MJ et al. Structural adaptations of the cold-active citrate synthase from an Antarctic bacterium. *Structure* 1998;**6**:351–61.
- Ræder ILU, Leiros I, Willassen NP et al. Uracil-DNA N-glycosylase (UNG) from the marine, psychrophilic bacterium *Vibrio salmonicida* shows cold adapted features. *Enzyme Microb Technol* 2008;**42**:594–600.
- Sauert M, Wolfinger MT, Vesper O et al. The MazF-regulon: a toolbox for the post-transcriptional stress response in *Escherichia coli*. *Nucleic Acids Res* 2016;**44**:6660–75.
- Saunders NFW, Thomas T, Curmi PMG et al. Mechanisms of thermal adaptation revealed from the genomes of the Antarctic Archaea *Methanogenium frigidum* and *Methanococcoides burtonii*. *Genome Res* 2003;**13**:1580–8.
- Seckbach J. Life on the edge and astrobiology: who is who in the polyextremophiles world? In: Seckbach J, Oren A, Stan-Lotter H (eds). *Polyextremophiles: Life Under Multiple Forms of Stress*. Dordrecht, The Netherlands: Springer, 2013, 61–79.
- Shen L, Yao T, Liu Y et al. Downward-shifting temperature range for the growth of snow-bacteria on glaciers of the Tibetan plateau. *Geomicrobiol J* 2014;**31**:779–87.
- Steven B, Briggs G, McKay CP et al. Characterization of the microbial diversity in a permafrost sample from the Canadian high Arctic using culture-dependent and culture-independent methods. *FEMS Microbiol Ecol* 2007a;**59**:513–23.
- Steven B, Léveillé R, Pollard WH et al. Microbial ecology and biodiversity in permafrost. *Extremophiles* 2006;**10**:259–67.
- Steven B, Niederberger TD, Bottos EM et al. Development of a sensitive radiorespiration method for detecting microbial activity at subzero temperatures. *J Microbiol Methods* 2007b;**71**:275–80.
- Steven B, Pollard WH, Greer CW et al. Microbial diversity and activity through a permafrost/ground ice core profile from the Canadian high Arctic. *Environ Microbiol* 2008;**10**:3388–403.
- Thomas T, Cavicchioli R. Effect of temperature on stability and activity of elongation factor 2 proteins from antarctic and thermophilic methanogens. *J Bacteriol* 2000;**182**:1328–32.
- Thomas T, Kumar N, Cavicchioli R. Effects of ribosomes and intracellular solutes on activities and stabilities of elongation factor 2 proteins from psychrotolerant and thermophilic methanogens. *J Bacteriol* 2001;**183**:1974–82.
- Tiwari P, Arora G, Singh M et al. MazF ribonucleases promote *Mycobacterium tuberculosis* drug tolerance and virulence in guinea pigs. *Nat Commun* 2015;**6**:6059.
- Vester JK, Glaring MA, Stougaard P. Improved cultivation and metagenomics as new tools for bioprospecting in cold environments. *Extremophiles* 2015;**19**:17–29.
- Wallon G, Lovett ST, Magyar C et al. Sequence and homology model of 3-isopropylmalate dehydrogenase from the psychrotrophic bacterium *Vibrio* sp. I5 suggest reasons for thermal instability. *Protein Eng* 1997;**10**:665–72.

- Wang J, Liu B, Liu G et al. Draft genome sequence of *Sporosarcina globispora* W 25 T (DSM 4), a psychrophilic bacterium isolated from soil and river water. *Genome Announc* 2015;**3**:2002–3.
- Wang N, Xu B, Liu Y et al. *Polaromonas eurypsychrophila* sp. nov., isolated from an ice core. *Int J Syst Evol Microbiol* 2016;**66**:2497–501.
- Watanabe S, Yasutake Y, Tanaka I et al. Elucidation of stability determinants of cold-adapted monomeric isocitrate dehydrogenase from a psychrophilic bacterium, *Colwellia maris*, by construction of chimeric enzymes. *Microbiology* 2005;**151**:1083–94.
- Yan W, Xiao X, Zhang Y. Complete genome sequence of the *Sporosarcina psychrophila* DSM 6497, a psychrophilic Bacillus strain that mediates the calcium carbonate precipitation. *J Biotechnol* 2016;**226**:14–5.
- Yang L-L, Tang S-K, Huang Y et al. Low temperature adaptation is not the opposite process of high temperature adaptation in terms of changes in amino acid composition. *Genome Biol Evol* 2015;**7**:3426–33.
- Yoon SH, Ha SM, Kwon S et al. Introducing EzBioCloud: a taxonomically united database of 16S rRNA and whole genome assemblies. *Int J Syst Evol Microbiol* 2017;**67**:1613–7.
- Yu Y, Xin YH, Liu HC et al. *Sporosarcina antarctica* sp. nov., a psychrophilic bacterium isolated from the Antarctic. *Int J Syst Evol Microbiol* 2008;**58**:2114–7.
- Zhao JS, Deng Y, Manno D et al. *Shewanella* spp. genomic evolution for a cold marine lifestyle and in-situ explosive biodegradation. *PLoS One* 2010;**5**:e9109.
